RESEARCH ARTICLE

# Voluntary medical male circumcision (VMMC) for prevention of heterosexual transmission of HIV and risk compensation in adult males in Soweto: Findings from a programmatic setting

Hillary Mukudu<sup>1,2\*</sup>, Janan Dietrich<sup>1</sup>, Kennedy Otwombe<sup>1</sup>, Mmatsie Manentsa<sup>1</sup>, Khuthadzo Hlongwane<sup>1</sup>, Maetal Haas-Kogan<sup>3</sup>, Benn Sartorius<sup>4</sup>, Neil Martinson<sup>1</sup>

**1** Perinatal HIV Research Unit (PHRU), Faculty of Health Sciences, University of the Witwatersrand, Johannesburg, South Africa, **2** School of Public Health, Faculty of Health Sciences, University of Witwatersrand, Johannesburg, South Africa, **3** Harvard Global Health Institute and Harvard University Center for AIDS Research, Harvard University, Cambridge, United States of America, **4** Department of Public Health Medicine, School of Nursing and Public Health, University of KwaZulu-Natal, Durban, South Africa

\* [mukuduh@gmail.com](mailto:mukuduh@gmail.com)

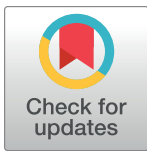

**OPEN ACCESS**

**Citation:** Mukudu H, Dietrich J, Otwombe K, Manentsa M, Hlongwane K, Haas-Kogan M, et al. (2019) Voluntary medical male circumcision (VMMC) for prevention of heterosexual transmission of HIV and risk compensation in adult males in Soweto: Findings from a programmatic setting. *PLoS ONE* 14(3): e0213571. <https://doi.org/10.1371/journal.pone.0213571>

**Editor:** Robert K Hills, University of Oxford, UNITED KINGDOM

**Received:** December 4, 2017

**Accepted:** February 25, 2019

**Published:** March 7, 2019

**Copyright:** © 2019 Mukudu et al. This is an open access article distributed under the terms of the [Creative Commons Attribution License](https://creativecommons.org/licenses/by/4.0/), which permits unrestricted use, distribution, and reproduction in any medium, provided the original author and source are credited.

**Data Availability Statement:** All files are available from the <https://dataverse.harvard.edu/dataset.xhtml?persistentId=doi:10.7910/DVN/OMKHOK>.

**Funding:** This study was funded by Fogarty International grant Centre (number 3U2RTW007370-05S1) and Canada-Africa Prevention Trials Network (CAPT-Network) (Mentorship Award Program 2012). They were both awarded to Dr Hillary Mukudu for completion

## Abstract

### Background

Clinical trials have clearly shown a reduction in HIV acquisition through voluntary medical male circumcision (VMMC). However, data assessing risk compensation under programmatic conditions is limited.

### Methods

This was a prospective cohort of HIV seronegative males aged 18–40 years receiving VMMC between November 2012 and July 2014. HIV serostatus was determined pre and post VMMC. Risk compensation was defined as a decrease in condom use at last sex act and/or an increase in concurrent sexual relationships, both measured twelve months post-circumcision.

### Results

A total of 233 males were enrolled and underwent voluntary medical male circumcision (VMMC) for prevention against HIV. There was no evidence of risk compensation post-circumcision as defined in this study. Significant increases in proportion of participants in the 18–24 years age group who knew the HIV status of their sexual partner (39% to 56%,  $p = 0.0019$ ), self-reported condom use at last sex act (21% to 34%,  $p = 0.0106$ ) and those reporting vaginal sexual intercourse in the past 12 months (67% to 79%,  $p\text{-value} < 0.0001$ ) were found. In both 18–24 and 25–40 years age groups, there was a significant increase in perception of being at risk of contracting HIV (70% to 84%,  $p\text{-value} < 0.0001$ ).

of Master of Science in Epidemiology and Biostatistics at University of Witwatersrand, Johannesburg. The Fogarty award was used for payment of tuition fees and study materials, whilst the CAPT Network funding was used for study activities including participant reimbursements and procurement of study equipment and materials. Additional funding was provided by South Africa Medical Research Council (SAMRC) as part of the National Health Scholarship Program (NHSP).

**Competing interests:** The authors have declared that no competing interests exist.

## Conclusion

No significant risk compensation was observed in this study on comparing pre-and post-circumcision behaviour. An increase in proportion of participants in the 18–24 years age group who had vaginal intercourse in the first 12 months post-circumcision as a possibility of risk compensation was minimal and negated by an increase in proportion of those reporting using a condom at the last sex act, increase in knowledge of partner's HIV status and lack of increase in alcohol post-circumcision.

## Introduction

Scale up of Voluntary Medical Male Circumcision (VMMC) in South Africa followed recommendations by the World Health Organization (WHO) for the roll-out of VMMC in 2007 as an added HIV prevention strategy in countries with a generalized HIV epidemic. By 2016, nearly 15 million VMMCs had been performed in 14 priority countries of Sub-Saharan Africa [1]. VMMC has been shown to decrease HIV infection under research conditions [2] [3]. However, data on risk compensation after circumcision in a programme setting is limited. Furthermore, evidence of risk compensation in males aged 24–40 years, the group with the highest HIV incidence in South Africa, also remains unknown [3].

There are concerns over the potential increase in high risk sexual behaviour as a result of risk compensation particularly in high HIV incidence age groups [4] [5] [6] which may mitigate the effectiveness of circumcision in preventing new HIV infections. Risk compensation is defined as modification of behaviour as a result of changes in the perceived risk of HIV infection [6]. With respect to HIV and circumcision, this would manifest itself in circumcised males knowing that they are less likely to contract HIV than before circumcision and in response, they might increase high-risk sexual behavior. In a 2013 study done in Uganda on male circumcision that assessed sexual behavior and HIV status, it was found that circumcised men are more likely to engage in risky behavior than their uncircumcised counterparts [7]. In contrast, another study done in Kenya found no evidence of risk compensation among males at least 24 months post-circumcision compared to the uncircumcised [8]. Also, a recent comparison of three cross-sectional studies showed an absence or minimal risk compensation [9].

This study sought to further explore and elucidate the effect of VMMC on risky behavior post-circumcision in a programme setting [10] [11].

## Methods

The study was conducted at a high volume VMMC clinic based at Chris Hani-Baragwanath Academic Hospital in Soweto, a peri-urban township in South Africa. A prospective cohort of men requesting VMMC was established, inviting every third HIV-seronegative male, aged 18–40 years who reported living in Soweto from November 2012 to July 2014 to participate. Men were circumcised routinely and followed up prospectively thereafter. A post-circumcision visit was scheduled 12 months after VMMC.

An original target sample size of 904 was set to satisfy the primary objective of the study which was to determine a 50% difference in one-year HIV sero-incidence between before and after circumcision at a power of 80%, assuming a 15% non-informative loss to follow-up after VMMC in adult males. However, due to funding constraints and logistical challenges, HIV

incidence was not reported on, and of the 496 participants enrolled, only follow-up data from 233 of these was utilised for the risk compensation analysis reported here.

Selected VMMC-trained staff of the clinic were trained and conducted all study procedures. A structured questionnaire focused on participants' recall of HIV-risk behavior in the 12 months period pre-VMMC was conducted at enrolment. Surgical MMC was then performed on participants according to WHO guidelines [12]. During the study follow-up period, participants were contacted monthly by telephone, to remind them of post-circumcision study visits. At a final study exit visit conducted 12 months post-VMMC, participants were tested for HIV using a rapid test and the structured questionnaire on risky behaviours was re-administered. Double data entry, was used to capture data into a REDCap database [13]. Questionnaires used were standardised and pilot tested prior to study commencement in October 2012.

The primary outcome of interest was HIV serostatus at the post-VMMC visit. Due to the rare occurrence of HIV incident infection over the study time frame (~3 sero-conversions in this case), HIV risk was represented by condom use at last sex act and concurrent sexual partnerships. These two variables were secondary outcomes of the study. Condom use at last sex act was defined as using a condom during the most recent sex act and concurrent sexual partnerships was defined as having more than one sexual partner at the time of the interview. We also measured perception of HIV risk as a possible confounder of concurrent sexual partnerships and condom use at last sex act. We defined perception of HIV risk as participant feeling that they were personally at risk of contracting HIV. Other confounders measured were having vaginal sexual intercourse in the last 12 months, a history of treatment of sexually transmitted infections (STIs) in the last 12 months, knowledge of sexual partners' HIV status at the last sex act and having taken alcohol at the time of last sexual act.

## Statistical analysis

Risk compensation was defined as a decrease in condom use at last sex act and or increase in concurrent sexual partners after circumcision. Selection of these two factors is based on the fact that concurrent sexual partnerships are main drivers behind high prevalence of HIV in sub-Saharan Africa among males. Furthermore, condom use is an effective mode of HIV prevention [14][15][16]. The association between categorical measures before and after circumcision was assessed using the McNemar's test.

## Ethical considerations

Study protocol was approved by the University of the Witwatersrand Human Research Ethics Committee (certificate #M120634). Chris Hani-Baragwanath Hospital Research Committee provided additional approval for the study. Strict confidentiality procedures were maintained and written informed consent was obtained from all participants. The study protocol can be accessed at: <http://dx.doi.org/10.17504/protocols.io.seiebce>.

## Results

### Demographics

The study enrolled 496 men, of whom 233 completed the 12-month follow-up visit (Fig 1 Study-flow).

Distribution of baseline characteristics is shown in Table 1. At sexual debut, higher condom use was reported for 18–24 years age group compared to 25–40 years age group (58% vs. 45%,  $p$ -value = 0.0469). More participants in 25–40 years age group had sexual intercourse in the previous twelve months compared to those in the 18–40 years age group (90% vs. 67%,

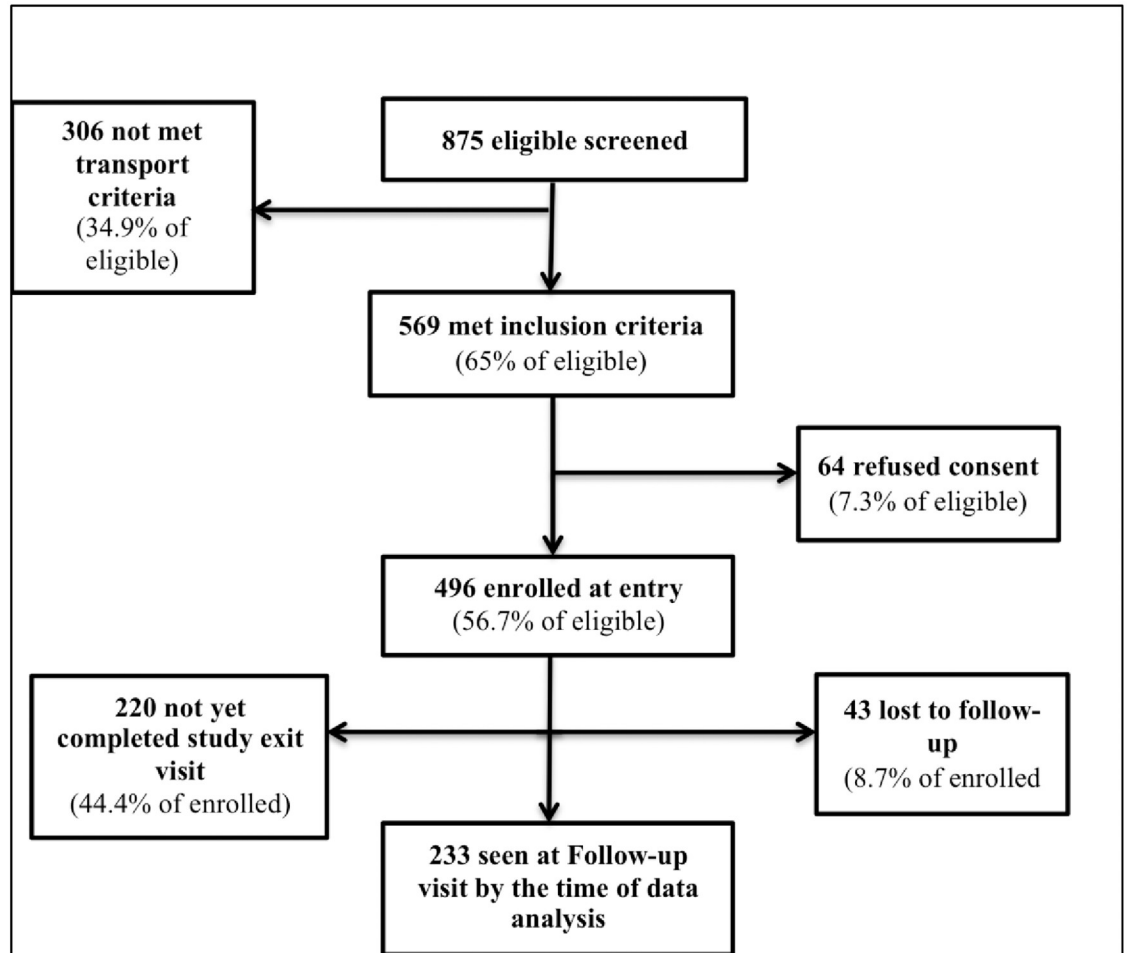

Fig 1. Screening, enrolment and follow-up of study participants.

<https://doi.org/10.1371/journal.pone.0213571.g001>

$p$ -value  $<0.0001$ ). A higher proportion of 25–40 years olds compared to 18–24 years olds also reported knowledge of partner’s HIV status (71% vs. 39%,  $p$ -value =  $<0.0001$ ) and use of condoms at the last sexual act (57% vs. 21%,  $p$ -value =  $<0.0001$ ).

Participants lost to follow-up or not yet completed 12 months visit did not differ from those retained in the study in relation to race, age, age at sexual debut, history of anal intercourse, condom use at last sex act, transactional sex, use of alcohol with sexual intercourse, risky sexual relationships, knowledge of sexual partners HIV status, and concurrent sexual partnerships (all  $p$ -values  $>0.05$ ). However, those who completed follow-up were less likely to have used intravenous drugs (0% vs. 3%,  $p = 0.005$ ) and less likely to have a history of an STI (2% vs 14%,  $p < 0.001$ ) (Table 2).

**Risky behaviours pre and post-circumcision.** The distribution of risky behaviours pre- and post VMMC is shown in Table 3. On comparing pre- to post-circumcision, there was a significant increase in the proportion of males engaging in sexual intercourse in the preceding twelve months from 184 (79%) to 204 (88%) ( $p$ -value = 0.0130), knowing the HIV status of sexual partner from 129 (55%) to 152 (65%) ( $p$ -value = 0.0063) and a perception of being at risk of contracting HIV from 162 (70%) to 195 (84%) ( $p$ -value =  $<0.0001$ ). There was also a significant increase in males using a condom at last sex act from 92(40%) to 112 (48%) ( $p$ -value = 0.0168).

**Table 1. Baseline demographic characteristics by age-group.**

| <u>Variables</u>                                | <u>Overall</u> | <u>18–24 years</u> | <u>25–40 years</u> | <u>P-Value</u> |
|-------------------------------------------------|----------------|--------------------|--------------------|----------------|
| <b>Number followed at 12 months</b>             | 233            | 113                | 120                |                |
| <b>Marital status</b>                           |                |                    |                    |                |
| Married/living together with partner n(%)       | 33 (14)        | 5 (4)              | 28 (23)            | < .0001        |
| Single/ Not married or living together n(%)     | 200 (86)       | 108 (96)           | 92 (77)            |                |
| <b>Occupational status</b>                      |                |                    |                    |                |
| Employed n(%)                                   | 104 (45)       | 29 (26)            | 75 (63)            | < .0001        |
| Student n(%)                                    | 57 (24)        | 53 (47)            | 4 (3)              |                |
| Unemployed n(%)                                 | 72 (31)        | 31 (27)            | 41 (34)            |                |
| <b>Education</b>                                |                |                    |                    |                |
| High/Primary school n(%)                        | 167 (72)       | 75 (66)            | 92 (77)            | 0.0813         |
| Tertiary n(%)                                   | 66 (28)        | 38 (34)            | 28 (23)            |                |
| <b>Reason for VMMC</b>                          |                |                    |                    |                |
| Prevention against HIV/STIs n(%)                | 158 (68)       | 81 (72)            | 77 (64)            | 0.2198         |
| Other n(%)                                      | 75 (32)        | 32 (28)            | 43 (36)            |                |
| <b>Had anal sex within past six months</b>      |                |                    |                    |                |
| No n(%)                                         | 224 (96)       | 108 (96)           | 116 (97)           | 0.7427         |
| Yes n(%)                                        | 9 (4)          | 5 (4)              | 4 (3)              |                |
| <b>Ever had vaginal sex</b>                     |                |                    |                    |                |
| No n(%)                                         | 12 (5)         | 12 (11)            | 0 (0)              | -              |
| Yes n(%)                                        | 221 (95)       | 101 (89)           | 120 (100)          |                |
| <b>Age for debut sex*</b>                       |                |                    |                    |                |
| <16 years n(%)                                  | 59 (27)        | 29 (29)            | 30 (25)            | 0.5342         |
| ≥16 years n(%)                                  | 162 (73)       | 72 (71)            | 90 (75)            |                |
| <b>Condom use for debut sex*</b>                |                |                    |                    |                |
| No n(%)                                         | 108 (49)       | 42 (42)            | 66 (55)            | <b>0.0469</b>  |
| Yes n(%)                                        | 113 (51)       | 59 (58)            | 54 (45)            |                |
| <b>Had vaginal sex within past 12 months</b>    |                |                    |                    |                |
| No n(%)                                         | 49 (21)        | 37 (33)            | 12 (10)            | < .0001        |
| Yes n(%)                                        | 184 (79)       | 76 (67)            | 108 (90)           |                |
| <b>Had alcohol before sex with main partner</b> |                |                    |                    |                |
| No n(%)                                         | 196 (84)       | 99 (87)            | 97 (80)            | 0.157          |
| Yes n(%)                                        | 37 (16)        | 14 (12)            | 23 (19)            |                |
| <b>Knowledge of partner's HIV status</b>        |                |                    |                    |                |
| No n(%)                                         | 104(35)        | 69 (61)            | 35 (29)            | < .0001        |
| Yes n(%)                                        | 129 (55)       | 44 (39)            | 85 (71)            |                |
| <b>Concurrent sexual partners</b>               |                |                    |                    |                |
| No n(%)                                         | 163 (70)       | 77 (68)            | 86 (72)            | 0.9104         |
| Yes n(%)                                        | 70 (30)        | 36 (32)            | 34 (28)            |                |
| <b>Condom use at last sex act</b>               |                |                    |                    |                |
| No n(%)                                         | 141 (61)       | 89 (79)            | 52 (43)            | < .0001        |
| Yes n(%)                                        | 92 (39)        | 24 (21)            | 68 (57)            |                |
| <b>Perception of HIV risk</b>                   |                |                    |                    |                |
| No n(%)                                         | 71 (30)        | 41 (36)            | 30 (25)            | 0.149          |
| Yes n(%)                                        | 162 (70)       | 72 (64)            | 90 (75)            |                |

\*Totals may not be equal to the sample size as a result of missing values

<https://doi.org/10.1371/journal.pone.0213571.t001>

**Table 2. Comparison of participants retained in the study and lost to follow-up.**

| Risk Factor                                      | Followed-<br>(n = 233) | Lost or not yet completed<br>(n = 263) | p-value            |
|--------------------------------------------------|------------------------|----------------------------------------|--------------------|
| Race: African n(%)                               | 233 (100)              | 260 (99)                               | 0.280*             |
| Age (mean years) (SD)                            | 25.5 (5.4)             | 25.6 (5.3)                             | 0.5823 †           |
| Age at Sexual Debut (mean years) (SD)            | 16.6 (2.3)             | 16.8 (2.6)                             | 0.8163 †           |
| Intravenous drug use n(%)                        | 0 (0)                  | 8 (3)                                  | <b>0.005*</b>      |
| History of STIs treatment in past 12 months n(%) | 4 (2)                  | 37 (14)                                | <b>&lt;0.0001*</b> |
| Concurrent sexual partners n(%)                  | 70 (30)                | 74 (28)                                | 0.641 ‡            |
| Condom Use at last sex act n(%)                  | 92(39)                 | 97 (37)                                | 0.587 ‡            |
| Transactional Sexual Intercourse n(%)            | 3 (1)                  | 0 (0)                                  | 0.103 *            |
| Use of alcohol with sexual intercourse n(%)      | 37 (16)                | 50 (19)                                | 0.360 ‡            |
| Knowledge of Partner's status n(%)               | 129 (55)               | 139 (53)                               | 0.575 ‡            |
| Perception of HIV risk n(%)                      | 162 (70)               | 181(69)                                | 0.865‡             |

\* Fisher's test

† t-test

‡ Chi<sup>2</sup> test

<https://doi.org/10.1371/journal.pone.0213571.t002>

**Comparison of HIV risk behaviour before and after circumcision between age groups.** A comparison of pre- and post-circumcision risky sexual behaviours stratified by age group (18–24 vs. 25–40 years) is shown in Table 4. There was an increase in proportion of men engaging in sexual intercourse for the 18–24 years age group. Similarly, knowledge of partners HIV status and condom use at last sex act was increased in the 18–24 age groups. In both age groups there was a significant increase in perception of being at risk of contracting HIV.

**Table 3. Pre and post-circumcision by sexual behaviours.**

| Variables                                                         | Before circumcision | After circumcision | P-Value           |
|-------------------------------------------------------------------|---------------------|--------------------|-------------------|
| <b>Number followed at 12 months</b>                               | 233                 | 233                |                   |
| <b>Had vaginal sex within past 12 months</b>                      |                     |                    |                   |
| No (%)                                                            | 49 (21)             | 29 (12)            | <b>0.0130</b>     |
| Yes (%)                                                           | 184 (79)            | 204 (88)           |                   |
| <b>Had alcohol before sex with at previous sexual intercourse</b> |                     |                    |                   |
| No (%)                                                            | 196 (84)            | 203(87)            | 0.3550            |
| Yes (%)                                                           | 37 (16)             | 30 (13)            |                   |
| <b>Knowledge of partner's HIV status</b>                          |                     |                    |                   |
| No (%)                                                            | 104 (45)            | 81 (35)            | <b>0.0063</b>     |
| Yes (%)                                                           | 129 (55)            | 152 (65)           |                   |
| <b>Concurrent sexual partners</b>                                 |                     |                    |                   |
| No(%)                                                             | 163 (70)            | 162 (70)           | 0.0910            |
| Yes (%)                                                           | 70(30)              | 71 (30)            |                   |
| <b>Condom use at last sex act</b>                                 |                     |                    |                   |
| No(%)                                                             | 141 (60)            | 121(52)            | <b>0.0168</b>     |
| Yes(%)                                                            | 92 (40)             | 112 (48)           |                   |
| <b>Perception of HIV risk</b>                                     |                     |                    |                   |
| No(%)                                                             | 71 (30)             | 38 (16)            | <b>&lt; .0001</b> |
| Yes (%)                                                           | 162 (70)            | 195 (84)           |                   |

<https://doi.org/10.1371/journal.pone.0213571.t003>

Table 4. Sexual behaviours by age group—Before and 12 months after circumcision.

| Variables                                                 | Before circumcision | After circumcision | Odds Ratio<br>95% Confidence Interval | P-Value         |
|-----------------------------------------------------------|---------------------|--------------------|---------------------------------------|-----------------|
| <b>Number followed at 12 months</b>                       | 233                 | 233                |                                       |                 |
| <b>Concurrent sexual partners</b>                         |                     |                    |                                       |                 |
| 18–24 Years n(%)                                          | 36 (32)             | 40 (35)            | 1.2 (0.6–2.4)                         | 0.6358          |
| 25–40 Years n(%)                                          | 34 (28)             | 31 (26)            | 0.9 (0.4–1.7)                         | 0.7493          |
| Overall n(%)                                              | 70 (30)             | 71 (30)            | 1.0 (0.6–1.6)                         | 0.9104          |
| <b>Had vaginal sex within past 12 months</b>              |                     |                    |                                       |                 |
| 18–24 Years n(%)                                          | 76 (67)             | 89 (79)            | <b>2.3 (2.0–5.2)</b>                  | < .0001         |
| 25–40 Years n(%)                                          | 108 (90)            | 115 (96)           | 21.6 (9.0–67.9)                       | < .0001         |
| Overall n(%)                                              | 184 (79)            | 204 (88)           | <b>2.7 (1.3–5.7)</b>                  | <b>0.0037</b>   |
| <b>Had alcohol before sex at last sexual intercourse*</b> |                     |                    |                                       |                 |
| 18–24 Years n(%)                                          | 14 (12)             | 17(15)             | 1.3 (0.5–3.6)                         | 0.6636          |
| 25–40 Years n(%)                                          | 23 (19)             | 13 (11)            | 0.4 (0.2–1.1)                         | 0.0755          |
| Overall n(%)                                              | 37 (16)             | 30 (13)            | 0.7 (0.4–1.4)                         | 0.3817          |
| <b>Knowledge of partner’s HIV status*</b>                 |                     |                    |                                       |                 |
| 18–24 Years n(%)                                          | 44 (39)             | 63 (56)            | <b>3.4 (1.5–8.6)</b>                  | <b>0.0019</b>   |
| 25–40 Years n(%)                                          | 85 (70)             | 89 (74)            | 1.25 (0.6–2.6)                        | 0.6177          |
| Overall n(%)                                              | 129 (55)            | 152 (65)           | <b>2.0 (1.2–3.3)</b>                  | <b>0.0086</b>   |
| <b>Condom use at last sex act</b>                         |                     |                    |                                       |                 |
| 18–24 Years n(%)                                          | 24 (21)             | 38 (34)            | <b>2.8 (1.2–7.1)</b>                  | <b>0.0106</b>   |
| 25–40 Years n(%)                                          | 52 (43)             | 74 (62)            | 1.4(0.7–2.7)                          | 0.4296          |
| Overall n(%)                                              | <b>92 (39)</b>      | <b>112 (48)</b>    | <b>0.6 (0.3–0.9)</b>                  | <b>0.0225</b>   |
| <b>Perception of HIV risk</b>                             |                     |                    |                                       |                 |
| 18–24 Years n(%)                                          | 72 (64)             | 91 (81)            | <b>3.4 (1.5–8.6)</b>                  | <b>0.0019</b>   |
| 25–40 Years n(%)                                          | 90 (75)             | 104 (87)           | <b>3.8 (1.4–13.0)</b>                 | <b>0.0066</b>   |
| Overall n(%)                                              | 162 (70)            | 195 (84)           | <b>3.5 (1.9–7.1)</b>                  | < <b>0.0001</b> |

\*Totals may not be equal to the overall as a result of missing values

<https://doi.org/10.1371/journal.pone.0213571.t004>

## Discussion

Our study’s findings corroborate evidence of absence of risk compensation after VMMC [17] [11]. Our study also illuminated possible additional benefits of VMMC programs specifically the HIV counselling and VMMC education sessions. It was found that post-circumcision participants in the 18–24 years age group were more likely to know the HIV status of their sexual partner and more likely to use a condom at the last sex act [18]. Absence of similar findings in the 25–40 years age will warrant further research considering that older men are at substantially higher HIV risk [3].

Our study also found that participants in the 18–24 years age group were more likely to engage in sexual intercourse after VMMC than before. This is in line with findings in other parts of Africa [11]. It could be explained by the fact that VMMC has been linked to sexuality and masculinity in some parts of South Africa which has increased uptake of the program [19] but also that the cohort had aged by a year.

These findings show that there is little or no change in risky sexual behaviour after circumcision, particularly absence of evidence for an increase in concurrent sexual partnerships is reassuring, specifically in the context of prior research suggesting that concurrent sexual partnerships are a main driver behind the high prevalence of HIV among males in sub-Saharan Africa. [16].

The increase in the proportions having sexual intercourse post-circumcision are not large and are not by themselves risky as evidenced by increase in condom use, knowledge of partner's HIV status and lack of increase in alcohol use.

Limitations of this study include the high dropout rate as evidenced by less than half of participants completing the 12-month study visit.

Data on risk factors was self-reported allowing for social desirability bias for which participants may have responded in a favourable manner. Having a single data point 12 months post-circumcision to collect data, may have introduced recall bias. Selection bias was introduced to the study by the inclusion criteria and having those who completed the 12 months follow-up visit being more likely to have used intravenous drugs and less likely to have a history of an STI. This limited generalizability of study findings as a representation of the general population with respect to age group, HIV status and those not seeking VMMC. Also, a lack of a control group which should have been uncircumcised males limited the generalizability of certain findings.

Effectiveness of VMMC must take into account changes in risk behaviours as well as possible effects of risk compensation. Further exploration must be undertaken to investigate why there was a significant increase or decrease in specific risk, and protective, behaviours post VMMC, and the relationship between risk behaviours and risk compensation.

## Conclusion

In this cohort we found in the 12 months post-circumcision compared to pre, participants in the 18–24 years age groups, were more likely to use a condom use at last sex act, more likely to know the HV status of sexual partner and more men (both 18-24- and 25-40-years age groups) considered themselves at risk of HIV infection. This suggests that there are other potential benefits conferred by VMMC in a programme setting as a biomedical and behavioural intervention for the prevention of HIV transmission.

## Acknowledgments

We acknowledge all participants of the study. The study was conducted at Khula Ndoda Medical Male Circumcision clinic based at Chris Hani-Baragwanath, which is funded by Gauteng Health and Society for Family Health. Data collection and other study procedures were done by Nelisiwe Hlatshwayo, Jabulile Ndou, Petros Tlou, Archie Khuba, Sibusiso Sibiyi, Alton Mboneli and Lucky Mathebula.

## Author Contributions

**Conceptualization:** Hillary Mukudu, Kennedy Otwombe, Neil Martinson.

**Data curation:** Hillary Mukudu.

**Formal analysis:** Hillary Mukudu, Kennedy Otwombe, Benn Sartorius, Neil Martinson.

**Funding acquisition:** Hillary Mukudu.

**Investigation:** Hillary Mukudu.

**Methodology:** Hillary Mukudu.

**Project administration:** Hillary Mukudu, Janan Dietrich.

**Resources:** Janan Dietrich.

**Writing – original draft:** Hillary Mukudu, Janan Dietrich, Kennedy Otwombe, Mmatsie Manentsa, Benn Sartorius, Neil Martinson.



**Writing – review & editing:** Hillary Mukudu, Janan Dietrich, Kennedy Otwombe, Mmatsie Manentsa, Khuthadzo Hlongwane, Maetal Haas-Kogan, Benn Sartorius, Neil Martinson.

## References

1. WHO. Voluntary Medical Male Circumcision for Hiv Prevention in 14 Priority Countries in East and Southern Africa. *Progress Br* [Internet]. 2015;2015–6. [http://apps.who.int/iris/bitstream/10665/179933/1/WHO\\_HIV\\_2015.21\\_eng.pdf](http://apps.who.int/iris/bitstream/10665/179933/1/WHO_HIV_2015.21_eng.pdf)
2. Mills E, Cooper C, Anema A, Guyatt G. Male circumcision for the prevention of heterosexually acquired HIV infection: a meta-analysis of randomized trials involving 11,050 men. *HIV Med* [Internet]. 2008 Jul [cited 2013 Feb 27]; 9(6):332–5. <http://www.ncbi.nlm.nih.gov/pubmed/18705758> PMID: 18705758
3. Shisana O, Rehle T, Simbayi LC, Zuma K, Jooste S, Zungu N. South African National HIV Prevalence, Incidence and Behaviour Survey, 2012. In: HSRC Press; 2014. p. 35–45. <http://www.hsrc.ac.za/en/research-outputs/view/6871>
4. Weiss HA, Dickson KE, Agot K, Hankins CA. Male circumcision for HIV prevention: current research and programmatic issues. *AIDS*. 2010; 24 Suppl 4:S61–9.
5. Westercamp M, Bailey RC, Bukusi E, Montandon M, Kwena Z, Cohen CR. Male circumcision in the general population of Kisumu, Kenya: beliefs about protection, risk behaviors, HIV, and STIs. *PLoS One* [Internet]. 2010 Jan [cited 2014 Jan 15]; 5(12):e15552. <http://www.pubmedcentral.nih.gov/articlerender.fcgi?artid=3002946&tool=pmcentrez&rendertype=abstract> PMID: 21179493
6. Eaton LA, Kalichman SC. Risk compensation in HIV prevention: Implications for vaccines, microbicides, and other biomedical HIV prevention technologies. *Curr HIV/AIDS Rep*. 2007; 4(4):165–72. PMID: 18366947
7. Kibira SPS, Nansubuga E, Tumwesigye NM. Demographic Health Survey Working Papers: Male Circumcision, Sexual Behavior, and HIV Status in Uganda [Internet]. ICF International; USAID; Maryland, USA; 2013. <https://www.dhsprogram.com/pubs/pdf/WP100/WP100.pdf>
8. Westercamp N, Agot K, Jaoko W, Bailey RC. Risk compensation following male circumcision: Results from a two-year prospective cohort study of recently circumcised and uncircumcised men in Nyanza Province, Kenya. *AIDS Behav*. 2014; 18(9):1764–75. <https://doi.org/10.1007/s10461-014-0846-4> PMID: 25047688
9. Westercamp M, Jaoko W, Mehta S, Abuor P, Siambe P, Bailey RC. Changes in Male Circumcision Prevalence and Risk Compensation in the Kisumu, Kenya Population, 2008–2013. *JAIDS J Acquir Immune Defic Syndr* [Internet]. 2017; 74(2):e30–7. <http://content.wkhealth.com/linkback/openurl?sid=WKPTLP:landingpage&an=00126334-201702010-00005> PMID: 27632232
10. Riess TH, Achieng' MM, Otieno S, Ndinya-Achola JO, Bailey R. “When I was circumcised I was taught certain things”: risk compensation and protective sexual behavior among circumcised men in Kisumu, Kenya. *PLoS One* [Internet]. 2010 Jan [cited 2013 Mar 25]; 5(8):e12366. <http://www.pubmedcentral.nih.gov/articlerender.fcgi?artid=2928269&tool=pmcentrez&rendertype=abstract> PMID: 20811622
11. Westercamp N, Agot K, Jaoko W, Bailey R. Risk compensation following male circumcision: results from a two-year prospective cohort study of recently circumcised and uncircumcised men in Nyanza Province. *AIDS Behav* [Internet]. 2014 [cited 2014 Oct 22]; 18(9):1764–75. <http://link.springer.com/article/10.1007/s10461-014-0846-4> PMID: 25047688
12. WHO. Male circumcision under local anaesthesia Version 3.1 [Internet]. [www.who.int/hiv/pub/malecircumcision/who\\_mc\\_local\\_anaesthesia.pdf](http://www.who.int/hiv/pub/malecircumcision/who_mc_local_anaesthesia.pdf)
13. Harris PA, Taylor R, Thielke R, Payne J, Gonzalez N, Jose G.C. Research Electronic Data Capture (REDCap)—a metadata driven methodology and workflow process for providing translational research informatic support. *J Biomed Inform*. 2009; 42(2):377–81. <https://doi.org/10.1016/j.jbi.2008.08.010> PMID: 18929686
14. Chen L, Jha P, Stirling B, Sgaier SK, Daid T, Kaul R, et al. Sexual risk factors for HIV infection in early and advanced HIV epidemics in sub-Saharan Africa: systematic overview of 68 epidemiological studies. *PLoS One* [Internet]. 2007 Jan [cited 2014 Nov 12]; 2(10):e1001. <http://www.pubmedcentral.nih.gov/articlerender.fcgi?artid=1994584&tool=pmcentrez&rendertype=abstract> PMID: 17912340
15. Hendriksen ES, Pettifor A, Lee S-J, Coates TJ, Rees HV. Predictors of condom use among young adults in South Africa: the Reproductive Health and HIV Research Unit National Youth Survey. *Am J Public Health* [Internet]. 2007 Jul [cited 2014 Oct 28]; 97(7):1241–8. <http://www.pubmedcentral.nih.gov/articlerender.fcgi?artid=1913066&tool=pmcentrez&rendertype=abstract> PMID: 17538062
16. Halperin D, Epstein H. Concurrent sexual partnerships help to explain Africa's high HIV prevalence: implications for prevention. *Lancet* [Internet]. 2004 [cited 2014 Nov 12]; 364:4–6. <http://scholar.google.com/scholar?hl=en&btnG=Search&q=intitle:Concurrent+sexual+partnerships+help+to+explain+Africa+'s+high+HIV+prevalence:+implications+for+prevention#0> PMID: 15234834

17. Mattson CL, Campbell R, Bailey RC, Agot K, Ndinya-Achola JO, Moses S. Risk compensation is not associated with male circumcision in Kisumu, Kenya: a multi-faceted assessment of men enrolled in a randomized controlled trial. *PLoS One* [Internet]. 2008 Jan [cited 2013 Mar 4]; 3(6):e2443. <http://www.pubmedcentral.nih.gov/articlerender.fcgi?artid=2409966&tool=pmcentrez&rendertype=abstract> PMID: 18560581
18. Chippindale S, French L. ABC of AIDS HIV counselling and the psychosocial management of patients with HIV or AIDS What is HIV counselling ? When is HIV counselling necessary ? Psychological responses to an HIV positive result. *Bmj*. 2011; 322:1533–5.
19. Humphries H, van Rooyen H, Knight L, Barnabas R, Celum C. 'If you are circumcised, you are the best': understandings and perceptions of voluntary medical male circumcision among men from KwaZulu-Natal, South Africa. *Cult Heal Sex*. 2015; 17(7):920–31.
